# Supplementary material
Source: Springer Nature journal article supplement (https://www.springermedizin.de/resource/supplementary/13045_2008_2_MOESM5_ESM.pdf/9660484)

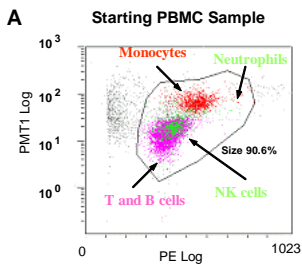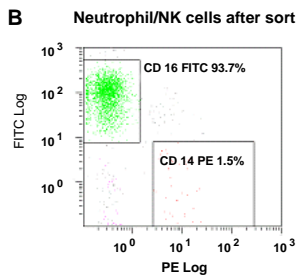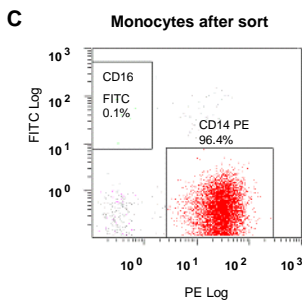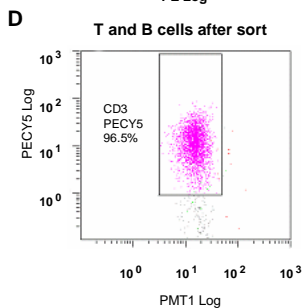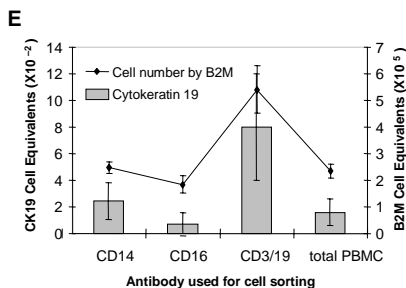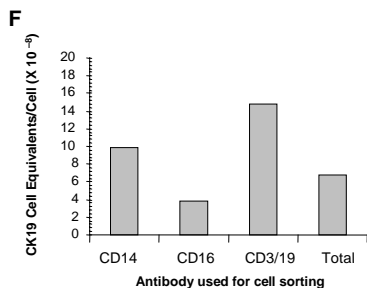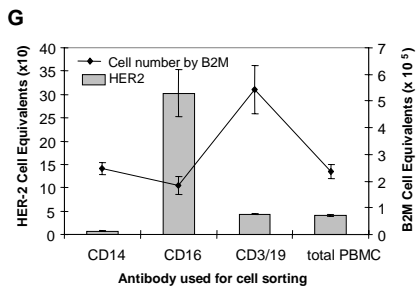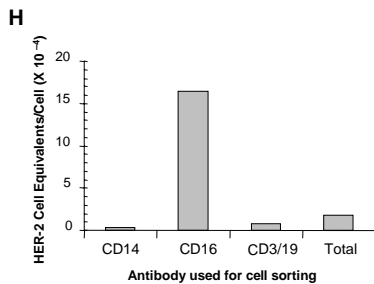

Supplement: MOESM5 [file 9660484]
